# Supplementary material
Source: Springer Nature journal article supplement (https://www.springermedizin.de/resource/supplementary/12936_2010_1347_MOESM1_ESM.pdf/9549574)

# Macha, Zambia Study Area: Location of Case and Control Households

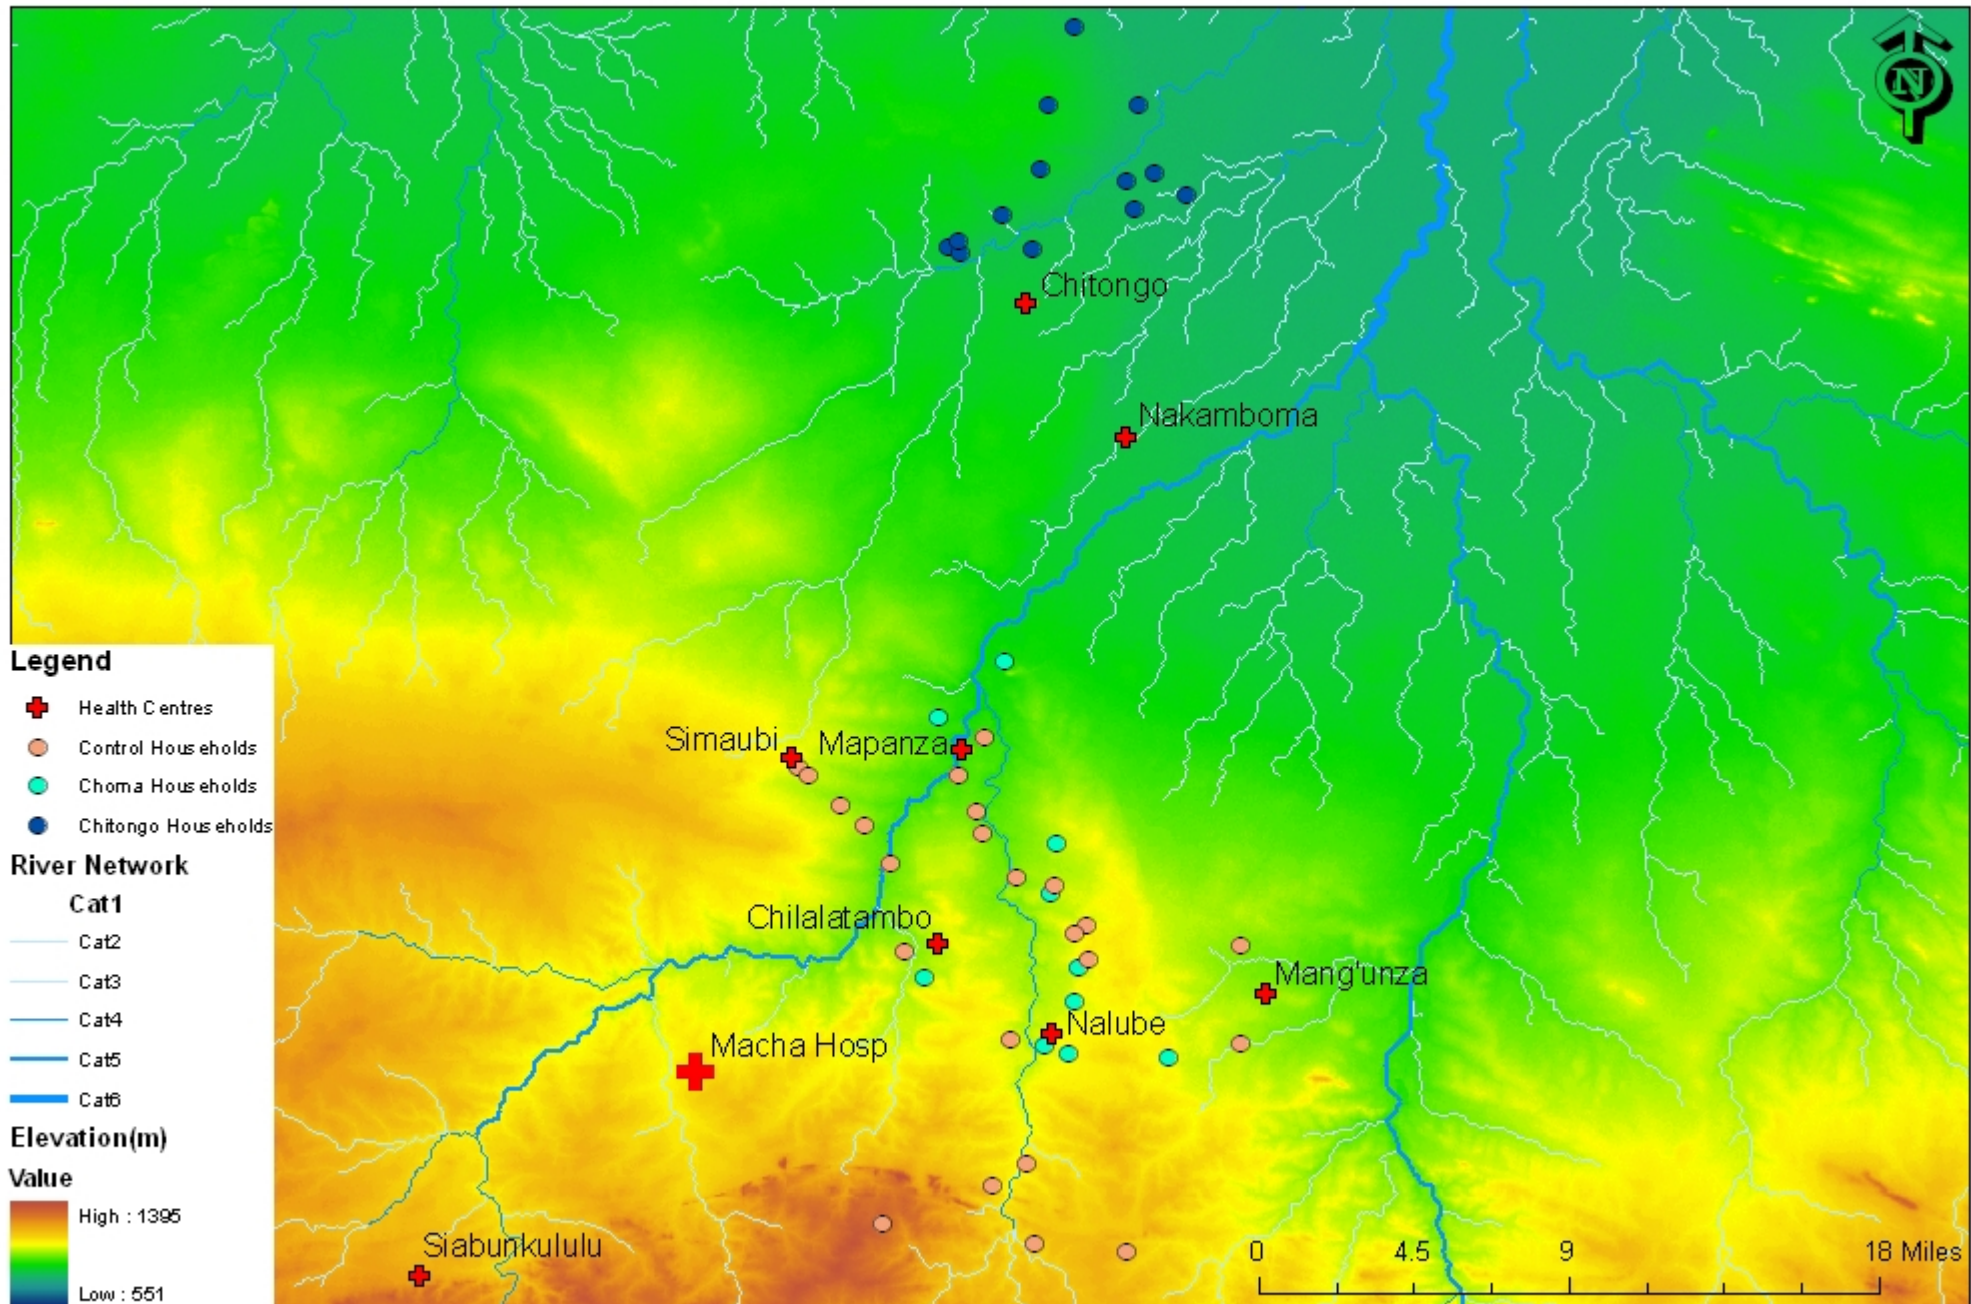

Supplement: MOESM1 [file 9549574]
